1 **Association of healthcare fragmentation and overall survival in patients with kidney**  
2 **transplant in Colombia**

3

4 **Author list:**

5 Luis Manuel Barrera<sup>1</sup>, Daniela Sánchez-Santiesteban<sup>2</sup>, Giancarlo Buitrago<sup>1,2</sup>

6

7 <sup>1</sup> Fundación Cardioinfantil – La Cardio, Bogotá D.C., Colombia

8 <sup>2</sup> Instituto de Investigaciones Clínicas. Facultad de Medicina. Universidad Nacional de

9 Colombia

10

11 **Corresponding author:**

12 Giancarlo Buitrago MD MSc PhD

13 E-mail: [gbuitragog@unal.edu.co](mailto:gbuitragog@unal.edu.co)

14 Address: Ave Cra 30 #45-03, Bogotá, Colombia

15 **ABSTRACT**

16 **Objective:** Kidney transplantation requires a multidisciplinary approach to achieve optimal  
17 outcomes. Healthcare fragmentation can negatively impact clinical outcomes; however, this  
18 issue remains understudied in low- and middle-income countries (LMICs). This study aimed  
19 to assess healthcare fragmentation in kidney transplant patients during their first post-  
20 transplant year and evaluate its association with three-year survival among patients enrolled  
21 in Colombia's contributory healthcare scheme.

22

23 **Methods:** A retrospective cohort study was conducted using administrative data from  
24 Colombia's contributory healthcare scheme. The cohort included kidney transplant recipients  
25 (2012–2016) who survived the first post-transplant year. Healthcare fragmentation was  
26 measured by the number of unique providers involved in the first year. Patients were  
27 categorised into high- and low-fragmentation groups based on the 75th percentile of provider  
28 distribution. The primary outcome was three-year survival, analysed using multivariate Cox  
29 regression to estimate hazard ratios (HRs), adjusted for age, sex, Charlson Comorbidity Index  
30 (CCI), insurer, region, and transplant year.

31

32 **Results:** The cohort comprised 2,028 kidney transplant patients, with a mean age of 47.7  
33 years (SD: 13.4), 38.7% female, and 68.7% presenting a  $CCI \leq 3$ . Healthcare fragmentation  
34 ranged from 1 to 34 providers, with a mean of 8.94 (SD: 6.77). High fragmentation ( $\geq 11$   
35 providers) was observed in 30.2% of patients. Three-year mortality was significantly higher  
36 in the high-fragmentation group (18%) compared to the low-fragmentation group (12%)  
37 ( $p=0.04$ ). High fragmentation was associated with a 49% increased mortality risk (adjusted  
38 HR: 1.49; 95% CI: 1.12–1.97;  $p=0.01$ ).

39

40 **Conclusion:** Healthcare fragmentation significantly reduces three-year overall survival in  
41 kidney transplant recipients in Colombia. These findings underscore the importance of  
42 integrated care models and improved coordination among providers to enhance patient  
43 outcomes, particularly in resource-limited settings.

44

45

46

47

48

49

50

51

52

53

54

55

56

57

58

59

60

61

62

## 63 INTRODUCTION

64 Kidney transplantation is recognised as the most effective treatment for patients with end-  
65 stage renal disease, significantly improving survival rates and quality of life compared to  
66 long-term dialysis [1,2]. Despite its clinical benefits, the success of renal transplantation  
67 depends heavily on comprehensive, multidisciplinary care that addresses various challenges,  
68 including immunosuppressive therapy, management of comorbid conditions, and the  
69 prevention and early detection of complications [3–5]. Coordinated care is critical in ensuring  
70 optimal outcomes, as patients require regular follow-ups, monitoring by specialised teams,  
71 and laboratory by healthcare providers [5]. However, fragmentation within healthcare  
72 systems, defined by inadequate communication and lack of integration among providers,  
73 disrupts this continuum of care, leading to adverse clinical outcomes [6–9]. In kidney  
74 transplantation, for example, fragmentation can lead to delays in diagnosis and treatment,  
75 duplication of medical services, increased costs, and worse health outcomes, ultimately  
76 compromising the potential benefits of transplantation [10,11].

77

78 Due to their fragmented health systems, Latin American countries face significant challenges  
79 in delivering integrated healthcare. In Colombia, fragmentation manifests both horizontally,  
80 through a lack of coordination between providers at the same level of care, and vertically  
81 [12]. This fragmentation is further exacerbated in Colombia by the decentralised structure of  
82 the healthcare system, which disperses responsibility across multiple actors, including public  
83 and private providers, insurers, and regional authorities. For complex medical procedures  
84 like kidney transplantation, the consequences of fragmentation are particularly severe as they  
85 encounter obstacles such as inconsistent follow-up, limited access to necessary medications,  
86 and insufficient communication between transplant centres and other providers. These

87 challenges not only hinder recovery but also increase the likelihood of complications,  
88 hospital readmissions, and preventable mortality.

89

90 Healthcare fragmentation has been studied in chronic conditions such as cancer and  
91 cardiovascular diseases [13–17]; however, kidney transplantation, which requires a similarly  
92 high level of care integration, remains understudied. To our knowledge, no studies have  
93 specifically evaluated the association between healthcare fragmentation and survival  
94 outcomes in renal transplant recipients in low- and middle-income countries (LMICs). This  
95 gap in the literature underscores the need for targeted research to understand better how  
96 fragmented care influences transplant success, particularly in the Colombian context, where  
97 fragmentation challenges are pronounced.

98

99 This study aims to address this gap by assessing the extent of care fragmentation experienced  
100 by renal transplant patients during the critical first year following transplantation and  
101 evaluating its association with three-year overall survival. By analysing data from a large  
102 national cohort, this research seeks to provide evidence of the association of healthcare  
103 fragmentation on clinical outcomes. The findings can potentially inform health policies and  
104 interventions to reduce care fragmentation, improve coordination among healthcare  
105 providers, and optimise resource use in this population. Ultimately, the study highlights the  
106 importance of integrated care models in enhancing renal transplant patients' survival and  
107 quality of life, particularly in resource-limited and fragmented healthcare systems like  
108 Colombia.

109

110 **METHODS**

## 111 **Study Design and Population**

112 This retrospective cohort study was conducted based on administrative data of adult patients  
113 who underwent kidney transplantation between 2012 and 2016 and were enrolled in the  
114 contributory health insurance system. The cohort was constructed using the Base for the  
115 Study of Capitation Unit Sufficiency (UPC) to identify all adult patients with a kidney  
116 transplantation record [18]. All subjects included in the study had to survive the first-year  
117 post-transplant to allow for the measurement of fragmentation during this period. After this  
118 initial year, each subject was followed for up to three years or until death, whichever occurred  
119 first. We used the Mortality Registry Module from the Unified Affiliation Registry (RUF)

120 to determine the mortality date [19].

121

122 This study utilised two primary administrative databases, anonymised and linked, using  
123 unique identifiers by the Ministry of Health (MoH). The UPC database is highly standardised  
124 and is the primary source of information used by the Ministry of Health (MoH) for the annual  
125 estimation of the UPC in the healthcare system. The database includes detailed information  
126 on each utilised service, such as the Unified Health Procedure Code (CUPS), an ICD-10 code  
127 associated with the service, the service date, the cost paid by each insurer to each provider,  
128 the patient's sex, the insurer to which the patient is affiliated, the city where the service was  
129 provided, the provider's registration code, and an anonymised individual identifier for each  
130 affiliate. Additionally, the RUF Mortality Registry Module contains information from  
131 death certificates for all Colombians, including the date of death and diagnosis. International  
132 assessments have confirmed the reliability of RUF data, with 91% of deaths registered  
133 through death certificates as of 2016 [20]. These databases were provided to the Clinical  
134 Research Institute at the Faculty of Medicine of the Universidad Nacional de Colombia by

135 the Office of Information Technologies of MoH for research purposes. This study was  
136 approved by the Faculty of Medicine Ethics Committee at the Universidad Nacional de  
137 Colombia (Approval Number: 004-029).

138

### 139 **Exposure, Outcome, and Control Variables**

140 As mentioned, all included patients survived the first-year post-transplantation as an  
141 inclusion criterion. To measure healthcare fragmentation, we counted the number of different  
142 healthcare providers involved in the patient's care during the first year of post-transplantation.  
143 This number was the primary exposure variable and has been used in similar studies [13–  
144 16,21]. After the first year of survival, all patients were followed for an additional three years.  
145 Using information from the RUAF database, the three-year survival time was estimated,  
146 corresponding to the study's primary outcome variable. Control variables included age, sex,  
147 comorbidities measured using the Charlson Comorbidity Index (CCI) [22], insurer,  
148 geographic region, and year of transplantation.

149

### 150 **Analysis**

151 Baseline characteristics of the cohort were described using measures of central tendency and  
152 dispersion for continuous variables and relative and absolute frequencies for categorical  
153 variables. The quartiles of the primary exposure variable (i.e., the number of different  
154 providers in the first-year post-transplantation) were identified.

155

156 The cohort was divided into high fragmentation (those exposed to a number of providers  
157 greater than or equal to the 75th percentile of the distribution) and low fragmentation (those  
158 exposed to a number of providers below the 75th percentile). An analysis of the crude three-

159 year mortality proportion and unadjusted survival was performed. Using a multivariate Cox  
160 regression model, the hazard ratio (HR) of being exposed to highly fragmented healthcare  
161 compared to low-fragmentation healthcare was estimated, controlling for the previously  
162 mentioned covariables. The proportionality assumption was evaluated with graphical and  
163 statistical tests using Schoenfeld residuals. All estimators were presented with 95%  
164 confidence intervals. Analyses were conducted using Stata 17 MP (licensed to the  
165 Universidad Nacional de Colombia). This article followed the STROBE (Strengthening the  
166 Reporting of Observational Studies in Epidemiology) guidelines to ensure transparency and  
167 thoroughness in reporting the findings.

168

## 169 **RESULTS**

170 Between 2012 and 2016, a total of 3,999 patients underwent kidney transplantation. After  
171 excluding 47 patients under 18 years old and 1,924 patients who died within the first year,  
172 2,028 patients were eligible for the study. No records were lost in the follow-up as each of  
173 the 2,028 participants was followed for three years or until death, whichever occurred first.  
174 The flowchart in Figure 1 provides additional details on the selection process.

175

176 **Fig 1. STROBE flow chart.** UPC: Base for the Study of Capitation Unit Sufficiency  
177 Database.

178

179 Table 1 presents detailed sociodemographic, clinical and exposure characteristics of the  
180 cohort. Of the total cohort, 785 patients (38.7%) were women, and the mean age was 47.7  
181 years (Standard Deviation [SD] 13.4 years). A total of 1,394 patients (68.7%) had a CCI of



182 3 or less. Bogotá was the region with the highest number of transplants, with a total of 923  
 183 (45.5%), and a decline in the number of transplants per year was observed (see Table 1).

184

185 **Table 1. Description of cohort baseline characteristics**

| Variable                                                       | Total         | Level of healthcare fragmentation |               |
|----------------------------------------------------------------|---------------|-----------------------------------|---------------|
|                                                                |               | Low                               | High          |
|                                                                | N=2,028       | N=1,415                           | N=613         |
| Female; N (%)                                                  | 785 (38.7%)   | 543 (38.4%)                       | 242 (39.5%)   |
| Age (years); X (SD)                                            | 47.70 (13.45) | 47.26 (13.43)                     | 48.72 (13.46) |
| Categorised age; N (%)                                         |               |                                   |               |
| 18-30                                                          | 237 (11.7%)   | 167 (11.8%)                       | 70 (11.4%)    |
| 30-49                                                          | 829 (40.9%)   | 605 (42.8%)                       | 224 (36.5%)   |
| 50-59                                                          | 560 (27.6%)   | 378 (26.7%)                       | 182 (29.7%)   |
| 60-69                                                          | 341 (16.8%)   | 221 (15.6%)                       | 120 (19.6%)   |
| 70 or older                                                    | 61 ( 3.0%)    | 44 ( 3.1%)                        | 17 ( 2.8%)    |
| CCI; Median (IQR)                                              | 3.00 (2.00)   | 2.00 (2.00)                       | 3.00 (3.00)   |
| Categorised CCI; N (%)                                         |               |                                   |               |
| 3 or less                                                      | 1,395 (68.8%) | 1,034 (73.1%)                     | 361 (58.9%)   |
| 4 a 5                                                          | 411 (20.3%)   | 240 (17.0%)                       | 171 (27.9%)   |
| 6 a 7                                                          | 151 ( 7.4%)   | 95 ( 6.7%)                        | 56 ( 9.1%)    |
| 8 or more                                                      | 71 ( 3.5%)    | 46 ( 3.3%)                        | 25 ( 4.1%)    |
| Geographic Region; N (%)                                       |               |                                   |               |
| Atlantica                                                      | 163 ( 8.0%)   | 84 ( 5.9%)                        | 79 (12.9%)    |
| Bogotá DC                                                      | 923 (45.5%)   | 697 (49.3%)                       | 226 (36.9%)   |
| Central                                                        | 377 (18.6%)   | 201 (14.2%)                       | 176 (28.7%)   |
| Oriental                                                       | 183 ( 9.0%)   | 119 ( 8.4%)                       | 64 (10.4%)    |
| Pacífica                                                       | 373 (18.4%)   | 307 (21.7%)                       | 66 (10.8%)    |
| Other departments                                              | 9 ( 0.4%)     | 7 ( 0.5%)                         | 2 ( 0.3%)     |
| Year of kidney transplant; N (%)                               |               |                                   |               |
| 2012                                                           | 571 (28.2%)   | 348 (24.6%)                       | 223 (36.4%)   |
| 2013                                                           | 430 (21.2%)   | 299 (21.1%)                       | 131 (21.4%)   |
| 2014                                                           | 493 (24.3%)   | 414 (29.3%)                       | 79 (12.9%)    |
| 2015                                                           | 291 (14.3%)   | 208 (14.7%)                       | 83 (13.5%)    |
| 2016                                                           | 243 (12.0%)   | 146 (10.3%)                       | 97 (15.8%)    |
| Healthcare fragmentation on first year post- kidney transplant |               |                                   |               |
| Mean of different healthcare; X (SD)                           | 8.94 (4.47)   | 6.63 (2.25)                       | 14.27 (3.71)  |

Categorised Healthcare fragmentation; N (%)

|                                 |               |                   |              |
|---------------------------------|---------------|-------------------|--------------|
| Low fragmentación (10 or less)  | 1,415 (69.8%) | 1,415<br>(100.0%) | 0 ( 0.0%)    |
| High fragmentación (11 or more) | 613 (30.2%)   | 0 ( 0.0%)         | 613 (100.0%) |

186 N: Number; X: Mean; SD: Standard Deviation; IQR: Interquartile Range; CCI:

187 Comorbidities Charlson Index

188

189 The degree of healthcare fragmentation, measured as the number of distinct providers  
 190 involved in a patient’s care during the first year post-transplant, ranged from 1 to 34, with a  
 191 mean of 8.94 (SD: 6.77). The 25th, 50th, and 75th percentiles were 6, 8, and 11 providers,  
 192 respectively. Among the regions analysed, the Central region exhibited the highest mean  
 193 fragmentation, with an average of 10.78 providers (SD: 4.65), while the Pacific region  
 194 showed the lowest, with an average of 7.96 providers (SD: 3.73) (Table 2). At the  
 195 departmental level, the highest fragmentation was observed in Sucre (14.00; SD: 5.10), La  
 196 Guajira (12.13; SD: 5.67), and Caquetá (13.60; SD: 5.19). Conversely, the lowest  
 197 fragmentation was found in Nariño (6.33; SD: 2.65) and Arauca (6.50; SD: 2.12). Figure 2  
 198 illustrates the geographic distribution of healthcare fragmentation across Colombia,  
 199 highlighting significant regional variability.

200

201 **Table 2. Healthcare Fragmentation by Geographic Regions in Colombia according to**  
 202 **the number of different providers involved during the first year of post-transplant**  
 203 **healthcare attention**

| Geographic Region <sup>a</sup> | Mean  | 95% CI       |
|--------------------------------|-------|--------------|
| Atlántica                      | 10.65 | 7.92 ; 13.38 |
| Bogotá DC                      | 8.25  | 5.51 ; 11.00 |
| Central                        | 10.79 | 7.90 ; 13.67 |

|                   |      |              |
|-------------------|------|--------------|
| Oriental          | 9.07 | 6.42 ; 11.72 |
| Pacífica          | 7.97 | 5.66 ; 10.28 |
| Other departments | 9.22 | 6.73 ; 11.72 |

204 <sup>a</sup> Atlantica: Atlántico, Bolívar, Cesar, Cordoba, Magdalena, La Guajira, Sucre, and San  
205 Andres; Metropolitan: Bogotá D.C. and Cundinamarca; Central: Antioquia, Caldas, Huila;  
206 Risaralda, Tolima, and Quindío; Oriental: Boyaca, Caquetá, Santander, Norte de Santander,  
207 Arauca, Meta, Casanare, and Guaviare; and Pacífica: Valle del Cauca, Cauca, Choco, and  
208 Nariño. Abbreviations: CI: Confidence Interval.

209

210 **Fig 2. Geographical distribution of healthcare fragmentation.** Geographic distribution of  
211 exposure to healthcare fragmentation measured as number of different HCPIs in the first year  
212 of care after kidney transplantation in adults belonging to the contributory regimen in  
213 Colombia. Abbreviations: HCPIs: Healthcare Provider Institutions.

214

215 Patients were categorised into two groups: high fragmentation, comprising those who  
216 consulted 11 or more providers ( $\geq p75$ ), and low fragmentation, comprising those who  
217 consulted ten or fewer providers ( $< p75$ ). 1,415 patients (69.7%) experienced low  
218 fragmentation, whereas 613 patients (30.2%) were exposed to high fragmentation. Table 3  
219 shows the crude three-year mortality proportions for each baseline characteristic evaluated.  
220 Patients exposed to low fragmentation had a mortality proportion of 0.12, while those  
221 exposed to high fragmentation had a mortality proportion of 0.18 ( $p=0.04$ ). Other  
222 characteristics where differences were observed included age category and CCI. No  
223 differences were found by sex or geographic region.

224

225 **Table 3. Three-year Mortality Proportions by Baseline Characteristics**

| Characteristic                                  | Mortality Proportion | 95% CI      |
|-------------------------------------------------|----------------------|-------------|
| Fragmentation in the first year post-transplant |                      |             |
| Low fragmentation (10 or fewer providers)       | 0.12                 | 0.10 - 0.14 |
| High fragmentation (11 or more providers)       | 0.18                 | 0.14 - 0.21 |
| Sex                                             |                      |             |
| Female                                          | 0.14                 | 0.12 - 0.16 |
| Male                                            | 0.14                 | 0.11 - 0.16 |
| Age category                                    |                      |             |
| 18-30                                           | 0.04                 | 0.01 - 0.06 |
| 30-49                                           | 0.09                 | 0.07 - 0.11 |
| 50-59                                           | 0.15                 | 0.12 - 0.18 |
| 60-69                                           | 0.27                 | 0.21 - 0.32 |
| 70 or older                                     | 0.39                 | 0.24 - 0.55 |
| Charlson Comorbidity Index                      |                      |             |
| 3 or fewer                                      | 0.10                 | 0.08 - 0.11 |
| 4 to 5                                          | 0.23                 | 0.19 - 0.28 |
| 6 to 7                                          | 0.25                 | 0.17 - 0.33 |
| 8 or more                                       | 0.14                 | 0.05 - 0.23 |
| Geographic region                               |                      |             |
| Atlantic                                        | 0.09                 | 0.05 - 0.14 |
| Bogotá DC                                       | 0.16                 | 0.13 - 0.19 |
| Central                                         | 0.11                 | 0.08 - 0.15 |
| Eastern                                         | 0.16                 | 0.10 - 0.22 |
| Pacific                                         | 0.13                 | 0.09 - 0.16 |
| Other departments                               | 0.00                 | NA          |
| Year of transplant                              |                      |             |
| 2012                                            | 0.12                 | 0.09 - 0.15 |
| 2013                                            | 0.11                 | 0.08 - 0.14 |
| 2014                                            | 0.17                 | 0.14 - 0.21 |
| 2015                                            | 0.15                 | 0.10 - 0.19 |
| 2016                                            | 0.15                 | 0.10 - 0.20 |

226 Abbreviations: 95% CI, 95% confidence interval.

227

228 Table 4 presents the multivariate Cox model, showing that exposure to a highly fragmented

229 healthcare increases the risk of death at 3 years by 49% (HR: 1.49; 95% CI 1.12–1.97;

230 p=0.01) after adjusting for sex, age, CCI, geographic region, year of transplantation, and

231 insurer (Figure 3). Other factors associated with lower three-year survival included being  
 232 over 30 years old, having a CCI greater than 4, and being female.

233

234 **Table 4. Adjusted HR of overall survival of adults with kidney transplants by the level**  
 235 **of healthcare fragmentation, defined by the number of different providers involved**  
 236 **during the first year of post-transplant healthcare attention**

| Characteristic                                  | Hazard Ratio | 95% CI       | P-Value |
|-------------------------------------------------|--------------|--------------|---------|
| Fragmentation in the first year post-transplant |              |              |         |
| Low fragmentation (10 or fewer providers)       | Ref          |              |         |
| High fragmentation (11 or more providers)       | 1.49         | 1.12 - 1.97  | 0.01    |
| Sex                                             |              |              |         |
| Male                                            | Ref          |              |         |
| Female                                          | 1.30         | 1.01 - 1.67  | 0.04    |
| Age category                                    |              |              |         |
| 18-30                                           | Ref          |              |         |
| 30-49                                           | 2.30         | 1.15 - 4.60  | 0.02    |
| 50-59                                           | 3.88         | 1.93 - 7.80  | <0.01   |
| 60-69                                           | 6.84         | 3.40 - 13.77 | <0.01   |
| 70 or older                                     | 12.01        | 5.51 - 26.20 | <0.01   |
| Charlson Comorbidity Index                      |              |              |         |
| 3 or fewer                                      | Ref          |              |         |
| 4 to 5                                          | 1.93         | 1.47 - 2.54  | <0.01   |
| 6 to 7                                          | 1.83         | 1.24 - 2.69  | <0.01   |
| 8 or more                                       | 1.09         | 0.57 - 2.10  | 0.79    |
| Geographic region                               |              |              |         |
| Atlantic                                        | Ref          |              |         |
| Bogotá DC                                       | 1.26         | 0.69 - 2.29  | 0.45    |
| Central                                         | 0.93         | 0.51 - 1.71  | 0.82    |
| Eastern                                         | 1.63         | 0.86 - 3.06  | 0.13    |
| Pacific                                         | 1.12         | 0.61 - 2.08  | 0.71    |
| Other departments                               | 0.00         | 0.00 - .     | 1.00    |
| Year of transplant                              |              |              |         |
| 2012                                            | Ref          |              |         |
| 2013                                            | 0.95         | 0.65 - 1.39  | 0.78    |
| 2014                                            | 1.19         | 0.83 - 1.71  | 0.35    |

|      |      |             |      |
|------|------|-------------|------|
| 2015 | 1.18 | 0.78 - 1.78 | 0.43 |
| 2016 | 1.47 | 0.92 - 2.35 | 0.11 |

237 The HR was adjusted for Sex, Age, CCI, geographic region, year of transplant and insurer.

238 Abbreviations: 95% CI, 95% confidence interval; Ref: Reference.

239

240 **Fig 3. Three-year overall survival of adults with kidney transplants by the level of**  
241 **healthcare fragmentation, defined by the number of different providers involved**  
242 **during the first year of post-transplant healthcare attention.**

243

244

## 245 **DISCUSSION**

246

247 This study evaluated the association between healthcare fragmentation during the first year  
248 after kidney transplantation and survival outcomes. Our findings demonstrate that high  
249 fragmentation, defined as exposure to 11 or more unique healthcare providers within the first-  
250 year post-transplant, was associated with a 49% increased mortality risk within three years  
251 (HR: 1.49; 95% CI 1.12–1.97; p=0.01) for each additional provider participating in  
252 healthcare during the first-year post-transplant.

253

254 Healthcare fragmentation in this study was measured by the number of different healthcare  
255 institutions involved in a patient's care during the first-year post-transplant. To our  
256 knowledge, this is the first study investigating the relationship between healthcare  
257 fragmentation and three-year survival of patients with kidney transplantation in an LMIC;  
258 however, this fragmentation metric has been used before in other chronic conditions, such as

259 cancer, and our findings are consistent with the existing literature, also reporting poorer  
260 outcomes in patients with high levels of fragmentation [13–15,21]. Mechanisms driving these  
261 associations likely include delays in treatment, duplication of medical services, and poor  
262 coordination among healthcare providers, all of which undermine the potential benefits of  
263 transplantation [17].

264

265 Our results also revealed significant geographical variability in fragmentation across  
266 Colombia. Patients in the Central and Atlantic regions experienced the highest levels of  
267 fragmentation. In contrast, patients in the Pacific region exhibited lower fragmentation levels,  
268 likely due to limited access to specialised care rather than effective healthcare integration.  
269 Additionally, in areas with low population density and fewer healthcare facilities, patients  
270 often need to travel long distances to access specialised care, potentially leading to delays in  
271 treatment. These findings underscore the need for fragmentation metrics that account for  
272 travel distance and geographic barriers, particularly in countries with pronounced disparities  
273 in healthcare availability and accessibility.

274

275 This study has several strengths. The reliability of the data is a crucial advantage as it  
276 provides robust evidence on the relationship between healthcare fragmentation and transplant  
277 outcomes. The UPC database has been widely used in previous studies [23–30], and the  
278 RUAF death registry offers extensive coverage, documenting over 90% of deaths  
279 nationwide, further supporting their validity as valuable research tools. Additionally, the  
280 specificity of kidney transplant procedures, which are unlikely to be misclassified due to their  
281 cost and complexity, enhances the reliability of the data.

282

283 However, some limitations must be addressed. Administrative databases lack detailed  
284 clinical information, which may leave behind some crucial covariables. Furthermore, there  
285 needs to be a standardised measure of fragmentation that limits comparisons with studies  
286 from other parts of the world. Future research should explore more nuanced fragmentation  
287 metrics to capture its association with clinical outcomes better. Qualitative studies could also  
288 provide valuable insights into the experiences of patients and providers navigating  
289 fragmented healthcare systems, helping to inform policy and improve care integration.

290

## 291 **CONCLUSION**

292 This study demonstrates that higher care fragmentation, measured by the number of unique  
293 healthcare providers involved during the first-year post-transplantation, is associated with  
294 reduced three-year overall survival in renal transplant patients in Colombia. Patients exposed  
295 to high fragmentation faced a 49% increased risk of death, highlighting the critical need to  
296 improve care coordination in this population. Our findings emphasise the importance of  
297 integrated healthcare models and multidisciplinary teams to reduce fragmentation, enhance  
298 clinical outcomes, and optimise resource use. Policymakers should prioritise efforts to  
299 streamline healthcare delivery, particularly in resource-limited settings, to mitigate the  
300 negative impacts of care fragmentation. Further research is needed to explore effective  
301 strategies for integrating care and addressing regional disparities in healthcare access, which  
302 could inform policies to improve outcomes for patients with chronic conditions, including  
303 those requiring renal transplantation.

304

## 305 **ACKNOWLEDGMENTS**



306 We thank Colombia's Ministry of Health and Social Protection for providing the  
307 administrative databases that made this study possible. We also thank the Clinical Research  
308 Student Group at the Faculty of Medicine of the Universidad Nacional de Colombia for their  
309 valuable contributions. This study's preliminary findings were presented and discussed  
310 within this group, enriching the interpretation and scope of our results. Additionally, this  
311 research was partially funded by the NIHR GHPSR researcher-led grant NIHR150067, which  
312 used UK aid from the UK Government to support global health research.

313

## 314 REFERENCES

- 315 1. Rosselli D, Rueda J-D, Diaz C. Cost-effectiveness of kidney transplantation compared with  
316 chronic dialysis in end-stage renal disease. *Saudi J Kidney Dis Transplant*. 2015;26: 733.  
317 doi:10.4103/1319-2442.160175
- 318 2. Johnson DS, Meyer KB. Integrated Care for People with Kidney Disease: The Perspective of  
319 a Nonprofit Dialysis Provider. *Clin J Am Soc Nephrol CJASN*. 2019;14: 448–450.  
320 doi:10.2215/CJN.13641118
- 321 3. Taber DJ, Pilch NA, McGillicuddy JW, Bratton CF, Chavin KD, Baliga PK. Improved Patient  
322 Safety and Outcomes With a Comprehensive Interdisciplinary Improvement Initiative in  
323 Kidney Transplant Recipients. *Am J Med Qual*. 2013;28: 103–112.  
324 doi:10.1177/1062860612450309
- 325 4. Thangto P, Srisuk O, Chunpeak K, Hutchinson A, Van Gulik N. Effectiveness of a  
326 multidisciplinary self-management education programme for kidney transplant recipients in  
327 Thailand. *J Kidney Care*. 2022;7: 163–171. doi:10.12968/jokc.2022.7.4.163
- 328 5. Fonouni H, Golriz M, Mehrabi A, Oweira H, Schmied BM, Müller SA, et al. The Role of an  
329 Interdisciplinary Transplant Team on Living Donation Kidney Transplantation Program.  
330 *Transplant Proc*. 2010;42: 137–140. doi:10.1016/j.transproceed.2009.12.038
- 331 6. Joo JY. Fragmented care and chronic illness patient outcomes: A systematic review. *Nurs*  
332 *Open*. 2023;10: 3460–3473. doi:10.1002/nop2.1607
- 333 7. Kern LM, Seirup JK, Rajan M, Jawahar R, Stuard SS. Fragmented ambulatory care and  
334 subsequent healthcare utilization among Medicare beneficiaries. *Am J Manag Care*. 2018;24:  
335 e278–e284.
- 336 8. Kern LM, Seirup JK, Rajan M, Jawahar R, Stuard SS. Fragmented ambulatory care and  
337 subsequent emergency department visits and hospital admissions among Medicaid  
338 beneficiaries. *Am J Manag Care*. 2019;25: 107–112.

- 339 9. Prior A, Vestergaard CH, Vedsted P, Smith SM, Virgilsen LF, Rasmussen LA, et al.  
340 Healthcare fragmentation, multimorbidity, potentially inappropriate medication, and  
341 mortality: a Danish nationwide cohort study. *BMC Med.* 2023;21: 305. doi:10.1186/s12916-  
342 023-03021-3
- 343 10. Rangaswami J, Bangalore S, Kaplan B, Birdwell KA, Wiseman AC, McCullough PA, et al.  
344 Cardiovascular disease care fragmentation in kidney transplantation: a call for action. *Kidney*  
345 *Int.* 2019;96: 568–571. doi:10.1016/j.kint.2019.04.042
- 346 11. Sloan CE, Zhong J, Mohottige D, Hall R, Diamantidis CJ, Boulware LE, et al. Fragmentation  
347 of care as a barrier to optimal ESKD management. *Semin Dial.* 2020;33: 440–448.  
348 doi:10.1111/sdi.12929
- 349 12. Organización Panamericana de la Salud. *Redes Integradas de Servicios de Salud: Conceptos,*  
350 *Opciones de Política y Hoja de Ruta para su Implementación en las Américas.* 2010.
- 351 13. Patiño AF, Buitrago G, Agudelo NR, Espinel LS, Gamboa O, Eslava-Schmalbach J, et al.  
352 Association of healthcare fragmentation and the survival of patients with colorectal cancer in  
353 Colombia. In Review; 2022 Aug. doi:10.21203/rs.3.rs-1856519/v1
- 354 14. Gamboa Ó, Buitrago G, Patiño AF, Agudelo NR, Espinel LS, Eslava-Schmalbach J, et al.  
355 Fragmentation of Care and Its Association With Survival and Costs for Patients With Breast  
356 Cancer in Colombia. *JCO Glob Oncol.* 2023; e2200393. doi:10.1200/GO.22.00393
- 357 15. Patiño-Benavidez AF, Buitrago G, Rozo-Agudelo N, Saldaña-Espinel LE, Gamboa-Garay  
358 ÓA, Eslava-Schmalbach J, et al. Association of Healthcare Fragmentation and the Survival of  
359 Patients with Colorectal Cancer in Colombia. *Value Health Reg Issues.* 2024;41: 63–71.  
360 doi:10.1016/j.vhri.2023.12.003
- 361 16. Rozo Agudelo N, Saldaña Espinel LE, Patiño Benavidez AF, Gamboa Garay OA, Buitrago G.  
362 Effect of healthcare fragmentation on breast, stomach, and colorectal cancer mortality in  
363 Colombia: A measurement estimated through administrative databases. *J Clin Oncol.* 2021;39:  
364 e18808–e18808. doi:10.1200/JCO.2021.39.15\_suppl.e18808
- 365 17. Frandsen BR, Joynt KE, Rebitzer JB, Jha AK. Care fragmentation, quality, and costs among  
366 chronically ill patients. *Am J Manag Care.* 2015;21: 355–362.
- 367 18. Ministerio de Salud y Protección Social. Unidad de pago por capitación (UPC). [cited 25 May  
368 2023]. Available: [https://www.minsalud.gov.co/salud/POS/Paginas/unidad-de-pago-por-](https://www.minsalud.gov.co/salud/POS/Paginas/unidad-de-pago-por-capitacion-upc.aspx)  
369 [capitacion-upc.aspx](https://www.minsalud.gov.co/salud/POS/Paginas/unidad-de-pago-por-capitacion-upc.aspx)
- 370 19. Ministerio de Salud y Protección Social. Registro Único de Afiliados RUAF. [cited 25 Apr  
371 2023]. Available: <https://ruaf.sispro.gov.co/>
- 372 20. Cendales R, Pardo C. Quality of death certification in Colombia. *Colomb Médica CM.* 49:  
373 121–127. doi:10.25100/cm.v49i1.3155
- 374 21. Nicolás Rozo Agudelo. *Desenlaces económicos sobre fragmentación en la atención de*  
375 *pacientes con cáncer de mama y estómago en el régimen contributivo en Colombia.* Bogotá,  
376 Colombia: Universidad Nacional de Colombia; 2022.

- 377 22. Oliveros H, Buitrago G. Validation and adaptation of the Charlson Comorbidity Index using  
378 administrative data from the Colombian health system: retrospective cohort study. *BMJ Open*.  
379 2022;12: e054058. doi:10.1136/bmjopen-2021-054058
- 380 23. Buitrago G, Moreno-Serra R. Conflict violence reduction and pregnancy outcomes: A  
381 regression discontinuity design in Colombia. Stock SJ, editor. *PLOS Med*. 2021;18:  
382 e1003684. doi:10.1371/journal.pmed.1003684
- 383 24. Buitrago G, Arevalo K, Moyano JS, Caycedo R, Gaitan H. Appendectomy in Third Trimester  
384 of Pregnancy and Birth Outcomes: A Propensity Score Analysis of a 6-Year Cohort Study  
385 Using Administrative Claims Data. *World J Surg*. 2020;44: 12–20. doi:10.1007/s00268-019-  
386 05200-x
- 387 25. Buitrago G, Junca E, Eslava-Schmalbach J, Caycedo R, Pinillos P, Leal LC. Clinical  
388 Outcomes and Healthcare Costs Associated with Laparoscopic Appendectomy in a  
389 Middle-Income Country with Universal Health Coverage. *World J Surg*. 2019;43: 67–74.  
390 doi:10.1007/s00268-018-4777-5
- 391 26. Torres GF, Alarcón BA, Reyes-Sanchez JM, Castaño-Gamboa N, Buitrago G. Net costs of  
392 breast cancer in Colombia: a cost-of-illness study based on administrative claims databases.  
393 *Cost Eff Resour Alloc*. 2024;22: 54. doi:10.1186/s12962-024-00562-z
- 394 27. Rosero EB, Eslava-Schmalbach J, Garzón-Orjuela N, Buitrago G, Joshi GP. Failure to Rescue  
395 and Mortality Differences After Appendectomy in a Low-Middle-Income Country and the  
396 United States. *Anesth Analg*. 2022 [cited 9 Dec 2024]. doi:10.1213/ANE.0000000000006336
- 397 28. Maldonado-Cañón K, Buitrago G, Molina G, Rincón Tello FM, Maldonado-Escalante J.  
398 Teaching hospitals and their influence on survival after valve replacement procedures: A  
399 retrospective cohort study using inverse probability of treatment weighting (IPTW). Ranjan R,  
400 editor. *PLOS ONE*. 2023;18: e0290734. doi:10.1371/journal.pone.0290734
- 401 29. Cuesta AJ, Guevara O, Buitrago G. Hospital volume, postoperative mortality, and costs after  
402 gastrectomy for gastric cancer in colombia: is there any association? *ABCD Arq Bras Cir Dig*  
403 *São Paulo*. 2023;36: e1745. doi:10.1590/0102-672020230027e1745
- 404 30. Amaya-Nieto J, Torres G, Buitrago G. Prevalence of lung cancer in Colombia and a new  
405 diagnostic algorithm using health administrative databases: A real-world evidence study.  
406 Guimaraes RM, editor. *PLOS ONE*. 2023;18: e0269079. doi:10.1371/journal.pone.0269079
- 407

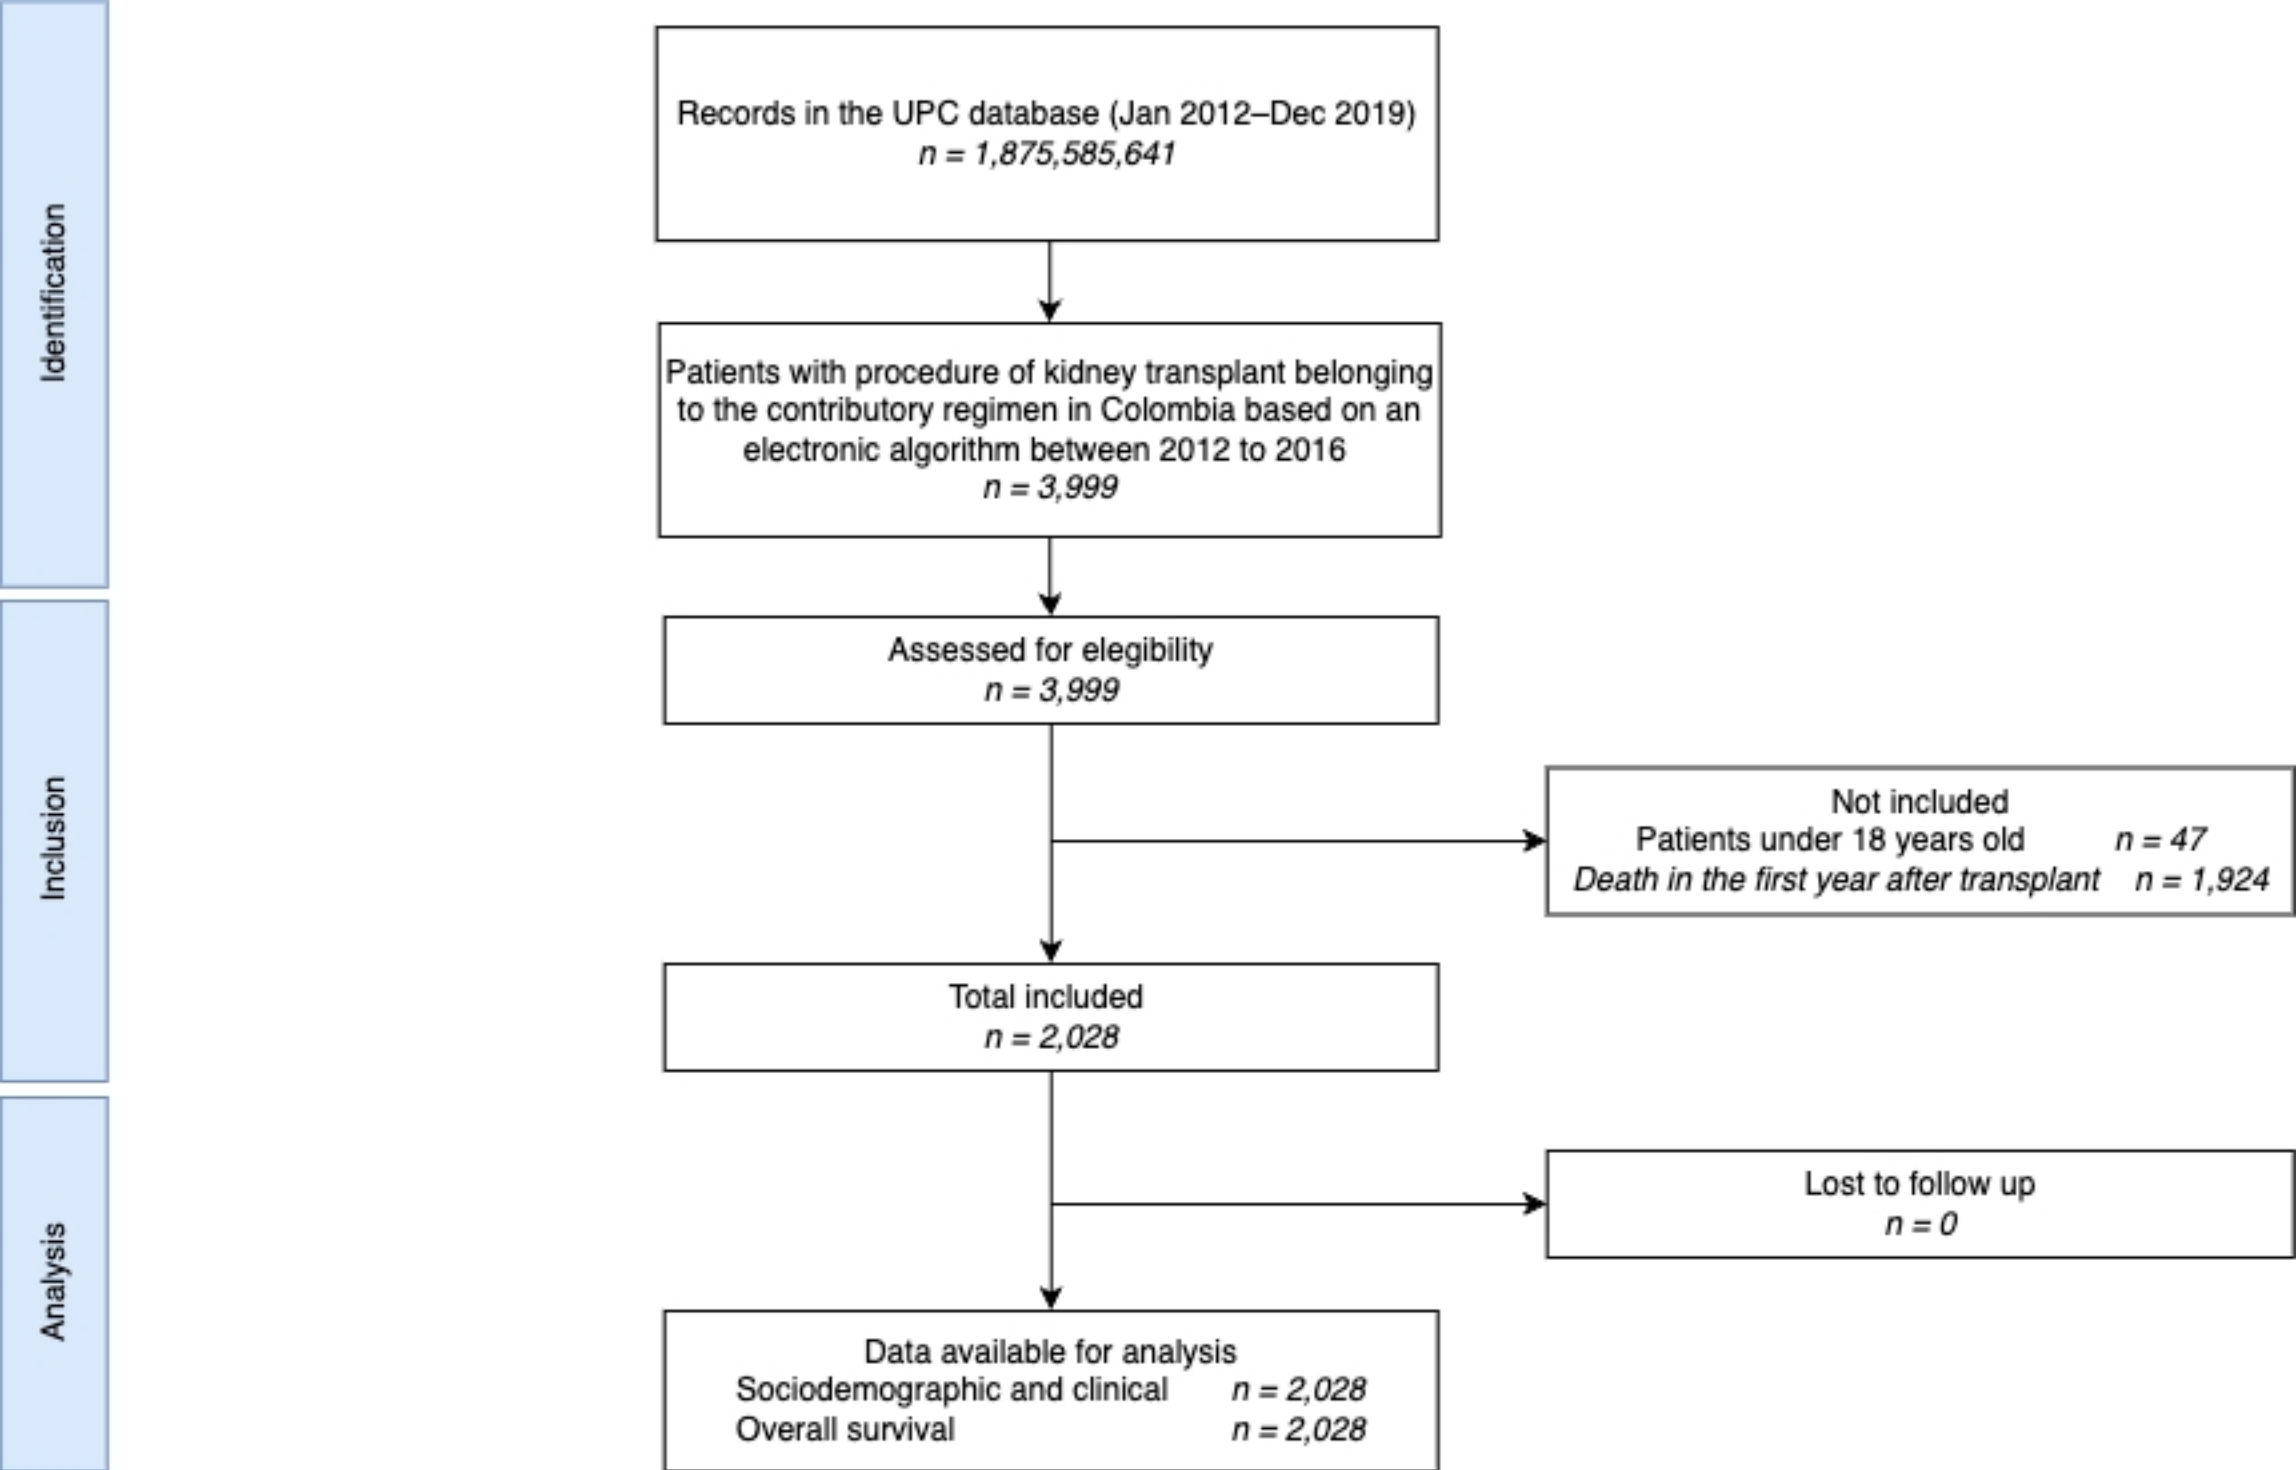

Fig1



# Overall survival by level of healthcare fragmentation

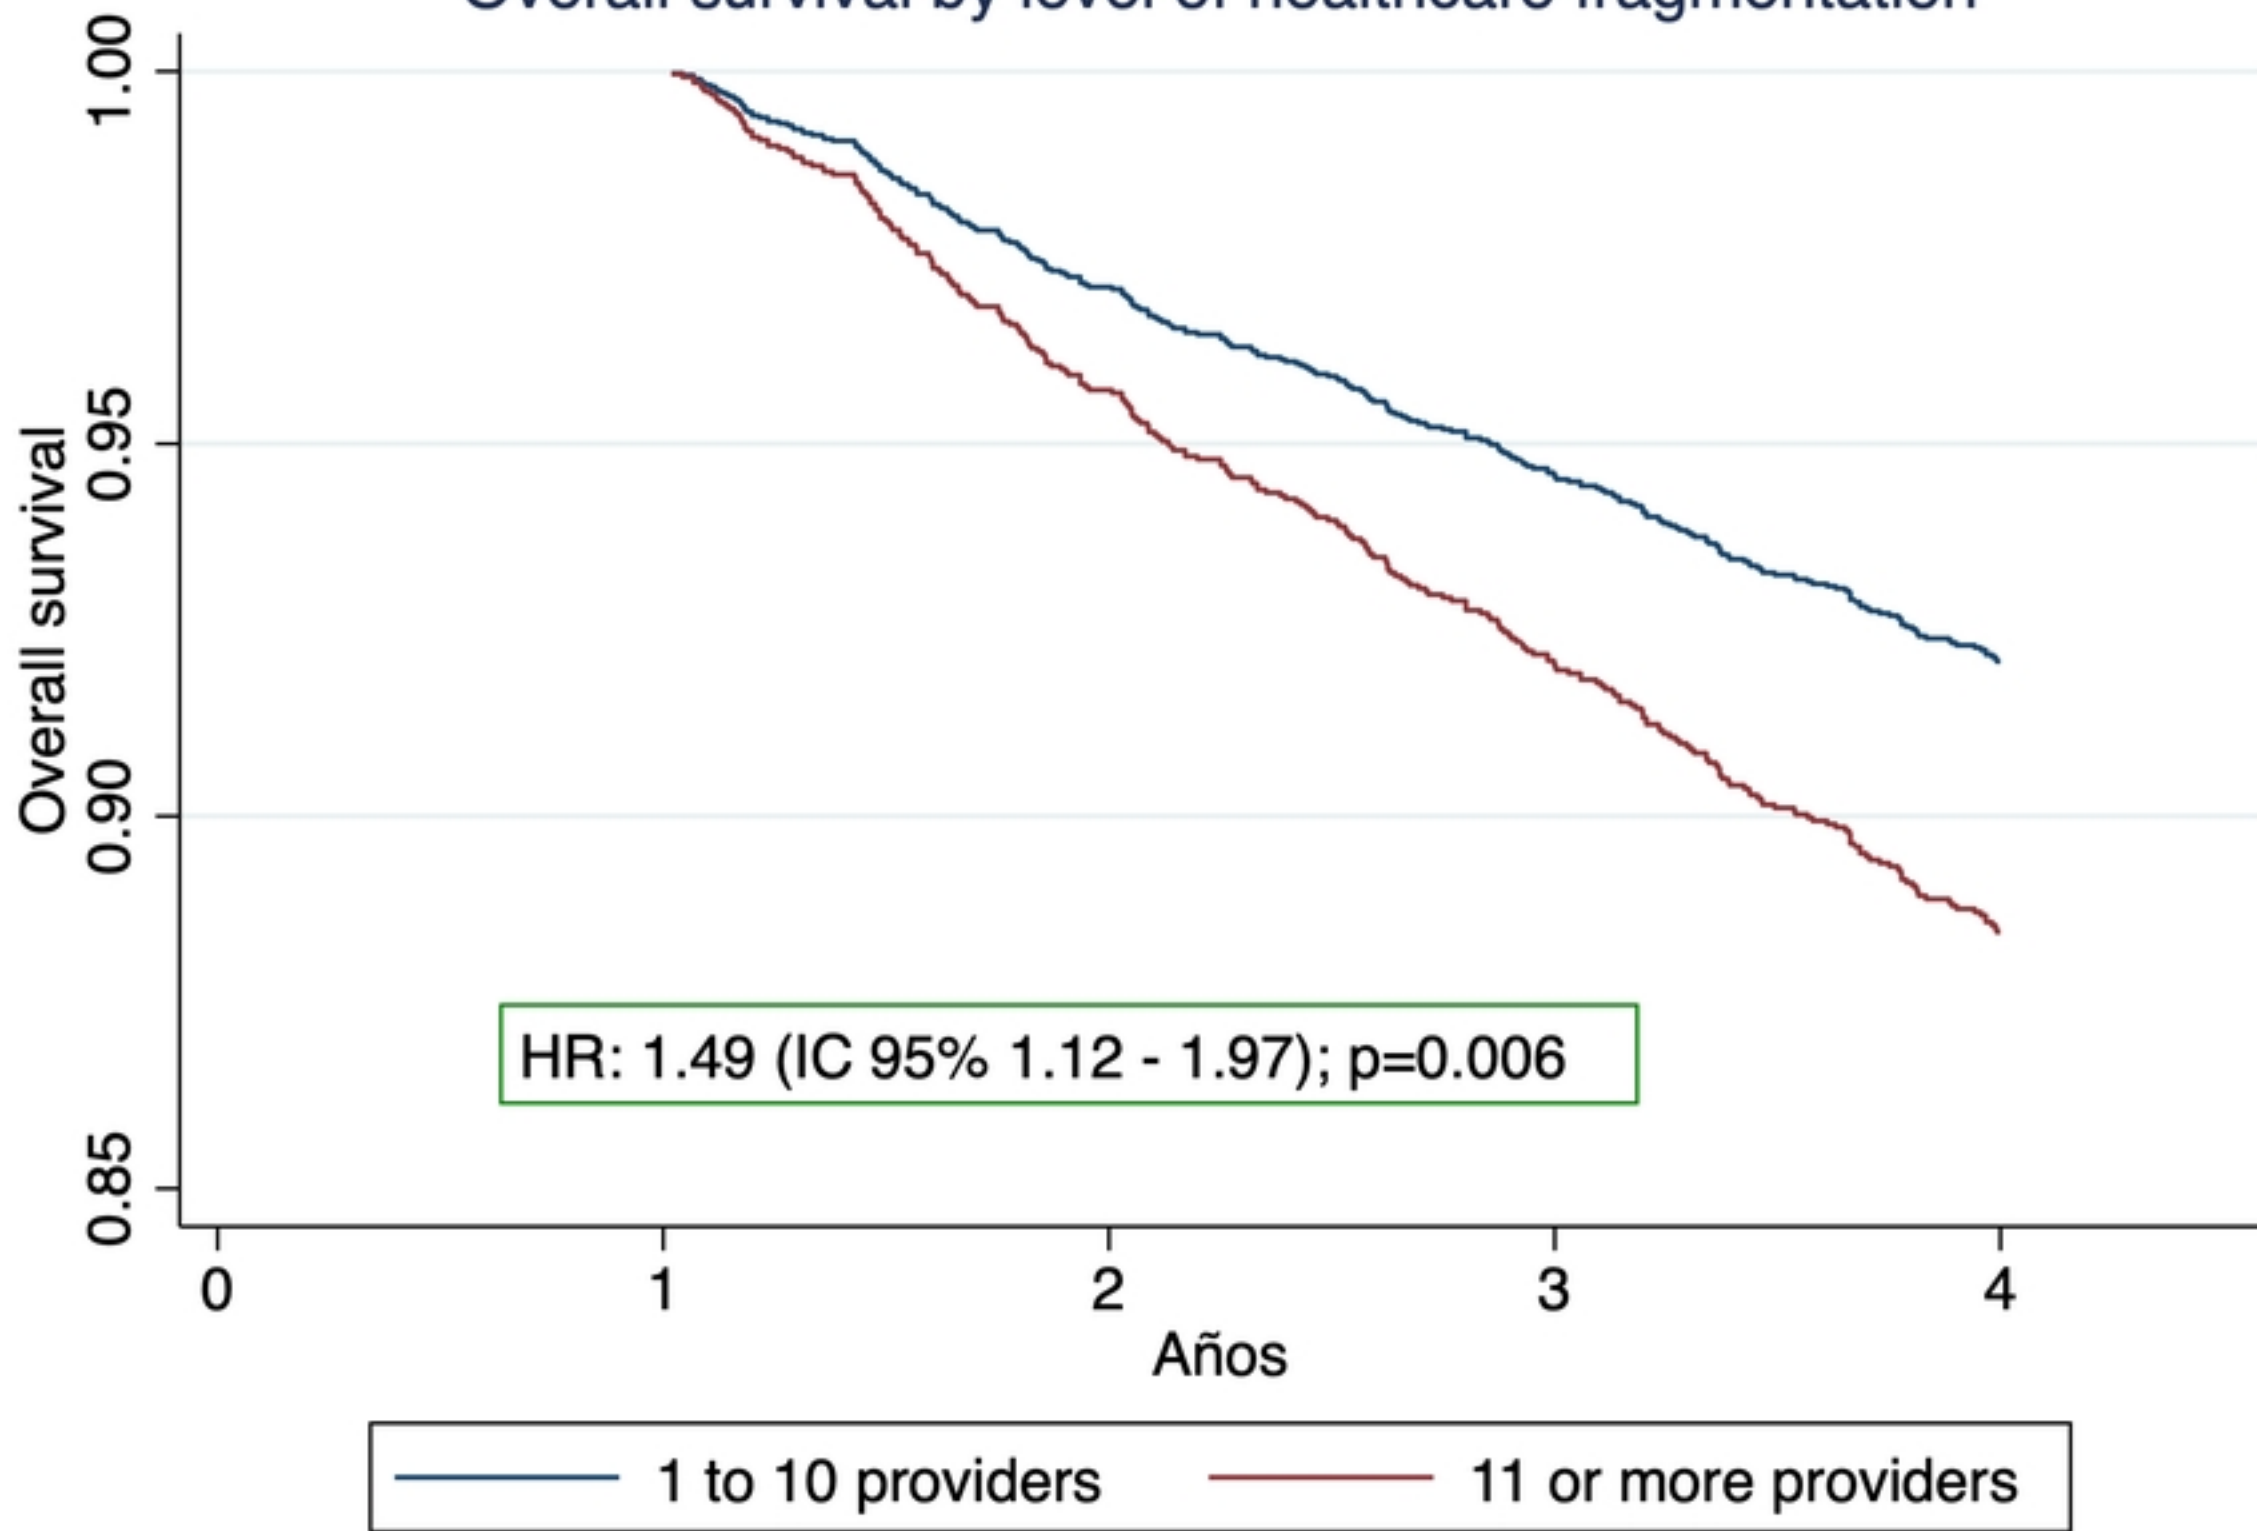

Fig3
